# Supplementary material for: Self-assembly of peptides: influence of substrate, pH and medium on the formation of supramolecular assemblies
Source: Royal Society of Chemistry journal article supplement (doi:10.1039/c0sm00897d), 2011-01-01
Supplement: c0sm00897d.pdf [file c0sm00897d.pdf]

## Supplementary Figure

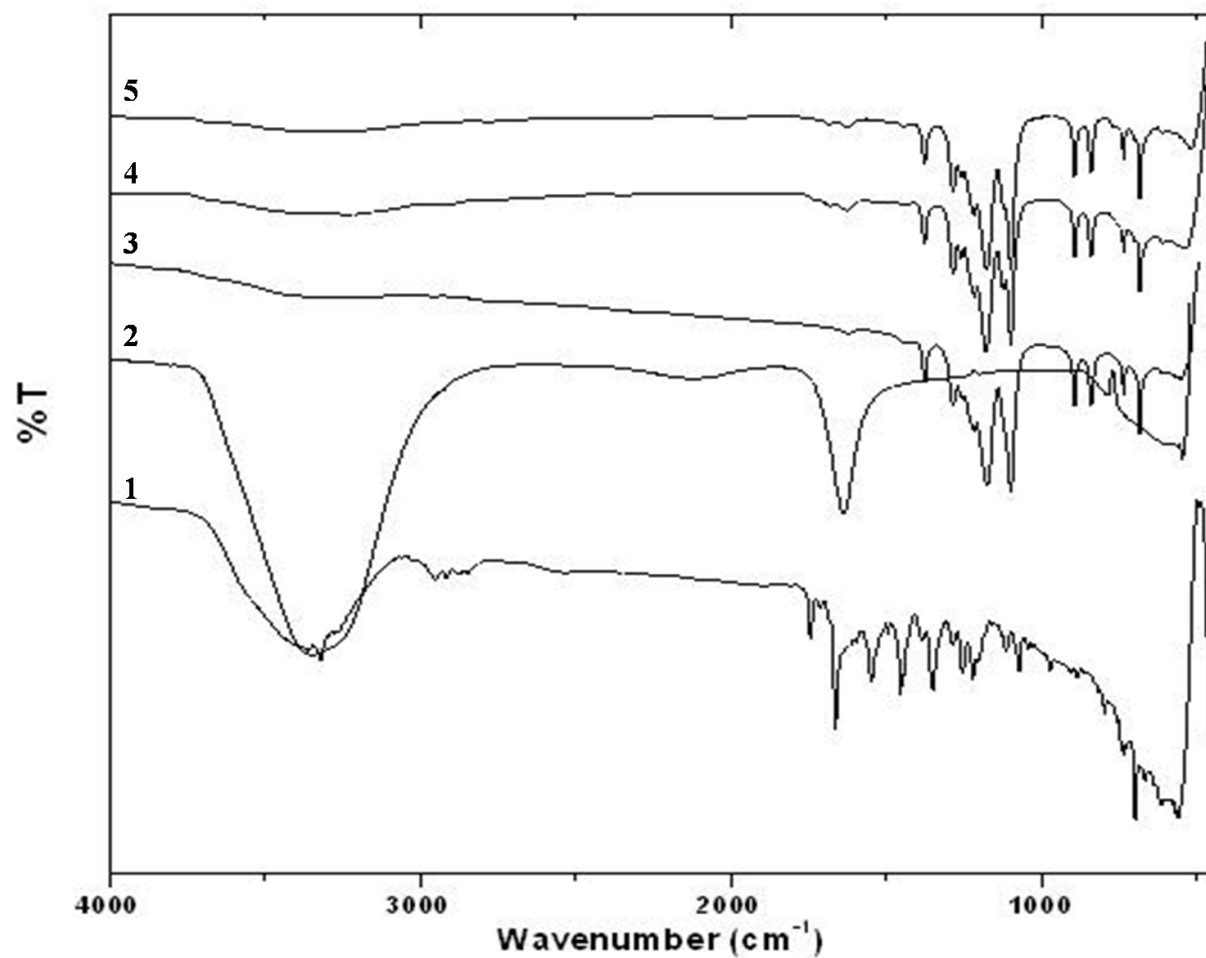

FTIR Spectra of solid FF dipeptide, FF nanotubes and FF dipeptide at various dilutions in HFIP solvent. [1] Solid FF dipeptide; [2] FF nanotubes; [3] FF in HFIP (10%w/v); [4] FF in HFIP (5% w/v); [5] FF in HFIP (2.5% w/v)
